# Supplementary material
Source: MDPI journal article supplement (https://www.mdpi.com/2072-4292/12/8/1252)
Supplement: s1 [file s1]

# Supplemental Materials for

## Introducing spatially distributed Fire Danger from Earth Observations (FDEO) Using satellite-based data in the Contiguous United States

Alireza Farahmand <sup>1</sup>, E. Natasha Stavros <sup>1</sup>, John T. Reager <sup>1</sup> and Ali Behrangi <sup>2</sup>

<sup>1</sup>Jet Propulsion Laboratory, California Institute of Technology, Pasadena, 91109, CA USA

<sup>2</sup>Department of hydrology and atmospheric sciences, The University of Arizona, Tucson, AZ, 85721 USA

**Table S1.** Confusion Matrix for Deciduous Land Cover type during 2004-2013 period. Orange indicates correctly classified pixels. Green indicates underestimated pixels by the model and Red indicates overestimated pixels detected by the model.

|            |                  | Observation  |        |              |        |
|------------|------------------|--------------|--------|--------------|--------|
| Prediction | <i>Deciduous</i> | Below Normal | Normal | Above Normal | Total  |
|            | Below Normal     | 54812        | 7961   | 14239        | 77012  |
|            | Normal           | 20245        | 32920  | 24338        | 77503  |
|            | Above Normal     | 2437         | 36133  | 38690        | 77260  |
|            | Total            | 77494        | 77014  | 77267        | 231775 |

**Table S2.** Confusion Matrix for Evergreen Land Cover type during 2004-2013 period. Orange indicates correctly classified pixels. Green indicates underestimated pixels by the model and Red indicates overestimated pixels detected by the model.

|            |                  | Observation  |        |              |        |
|------------|------------------|--------------|--------|--------------|--------|
| Prediction | <i>Evergreen</i> | Below Normal | Normal | Above Normal | Total  |
|            | Below Normal     | 52095        | 12401  | 14184        | 78680  |
|            | Normal           | 14672        | 34287  | 31109        | 80068  |
|            | Above Normal     | 12466        | 28250  | 38407        | 79123  |
|            | Total            | 79233        | 74938  | 83700        | 237871 |

**Table S3.** Confusion Matrix for Shrubland Land Cover type during 2004–2013 period. Orange indicates correctly classified pixels. Green indicates underestimated pixels by the model and Red indicates overestimated pixels detected by the model.

|            |                  | Observation  |        |              |        |
|------------|------------------|--------------|--------|--------------|--------|
| Prediction | <i>Shrubland</i> | Below Normal | Normal | Above Normal | Total  |
|            | Below Normal     | 79924        | 19188  | 23294        | 122406 |
|            | Normal           | 22323        | 51586  | 51581        | 125490 |
|            | Above Normal     | 21425        | 40586  | 61822        | 123833 |
|            | Total            | 123672       | 111360 | 136697       | 371729 |



**Table S4.** Confusion Matrix for Herbaceous Land Cover type during 2004-2013 period. Orange indicates correctly classified pixels. Green indicates underestimated pixels by the model and Red indicates overestimated pixels detected by the model.

|            |                   | Observation  |        |              |        |
|------------|-------------------|--------------|--------|--------------|--------|
| Prediction | <i>Herbaceous</i> | Below Normal | Normal | Above Normal | Total  |
|            | Below Normal      | 54027        | 12254  | 11090        | 77371  |
|            | Normal            | 13144        | 34545  | 31124        | 78813  |
|            | Above Normal      | 10785        | 28711  | 38381        | 77877  |
|            | Total             | 77956        | 75510  | 80595        | 234061 |

**Table S5.** Confusion Matrix for Wetland Land Cover type during 2004-2013 period. Orange indicates correctly classified pixels. Green indicates underestimated pixels by the model and Red indicates overestimated pixels detected by the model.

|            |                | Observation  |        |              |       |
|------------|----------------|--------------|--------|--------------|-------|
| Prediction | <i>Wetland</i> | Below Normal | Normal | Above Normal | Total |
|            | Below Normal   | 9583         | 3539   | 3811         | 16933 |
|            | Normal         | 4481         | 6472   | 6267         | 17220 |
|            | Above Normal   | 3188         | 6662   | 7305         | 17155 |
|            | Total          | 17252        | 16673  | 17383        | 51308 |

**Table S6.** Confusion Matrix for Entire CONUS during 2004–2013 period. Orange indicates correctly classified pixels. Green indicates underestimated pixels by the model and Red indicates overestimated pixels detected by the model.

|            |                | Observation  |        |              |         |
|------------|----------------|--------------|--------|--------------|---------|
| Prediction | <i>Wetland</i> | Below Normal | Normal | Above Normal | Total   |
|            | Below Normal   | 250441       | 55343  | 66618        | 372402  |
|            | Normal         | 74865        | 159810 | 144419       | 379094  |
|            | Above Normal   | 50301        | 140342 | 184605       | 375248  |
|            | Total          | 375607       | 355495 | 395642       | 1126744 |
